# Supplementary material for: Accelerating metal nanoparticle exsolution by exploiting tolerance factor of perovskite stannate
Source: Royal Society of Chemistry journal article supplement (doi:10.1039/d4mh00294f), 2024-01-01
Supplement: d4mh00294f1.pdf [file d4mh00294f1.pdf]

***Supplementary information for***

**Accelerating metal nanoparticle exsolution by exploiting tolerance factor of  
perovskite stannate**

Yujeong Lee<sup>1), 2), 3), #</sup>, Daseob Yoon<sup>1), #</sup>, Yeon-Seo Nam<sup>1), #</sup>, Sangbae Yu<sup>1)</sup>, Chaesung Lim<sup>2)</sup>, Hyeji Sim<sup>1)</sup>, Yunkyu Park<sup>1)</sup>, Jeong Woo Han<sup>2), 3), \*</sup>, Si-Young Choi<sup>1), \*</sup>, and Junwoo Son<sup>2), 3), \*</sup>

<sup>1)</sup> Department of Materials Science and Engineering, Pohang University of Science and  
Technology (POSTECH), Pohang 37673, Republic of Korea

<sup>2)</sup> Research Institute of Advanced Materials, Seoul National University, Seoul 08826, Republic of  
Korea

<sup>3)</sup> Department of Materials Science and Engineering, Seoul National University, Seoul 08826,  
Republic of Korea

# These authors contributed equally to this work.

\* junuson@snu.ac.kr; youngchoi@postech.ac.kr; jwhan98@snu.ac.kr;

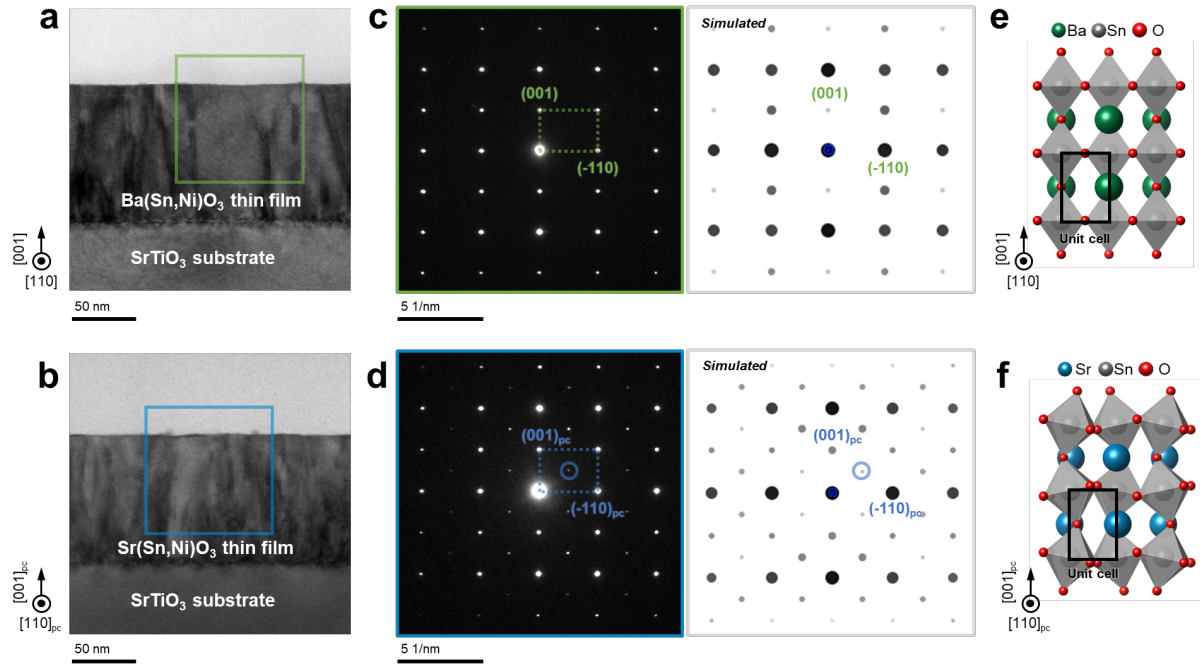

**Figure S1 | The crystal structure of Ba(Sn,Ni)O<sub>3</sub> [Pm $\bar{3}$ m] and Sr(Sn,Ni)O<sub>3</sub> [Pnma] using transmission electron microscopy. a**, The low magnification image of Ba<sub>0.9</sub>Sn<sub>0.9</sub>Ni<sub>0.1</sub>O<sub>3- $\delta$</sub>  (BSNO) and **b**, Sr<sub>0.9</sub>Sn<sub>0.9</sub>Ni<sub>0.1</sub>O<sub>3- $\delta$</sub>  (SSNO) film with ~100 nm thickness on SrTiO<sub>3</sub> substrate along with [110] and [110]<sub>pc</sub> zone axis. **c**, The experimental diffraction patterns of BSNO (green square marked in **Fig. S1a**) and **d**, SSNO thin film (blue square marked in **Fig. S1b**), with simulated diffraction patterns. **e**, The crystal structure of BSNO and **f**, SSNO marked with black squares indicates the unit cell.

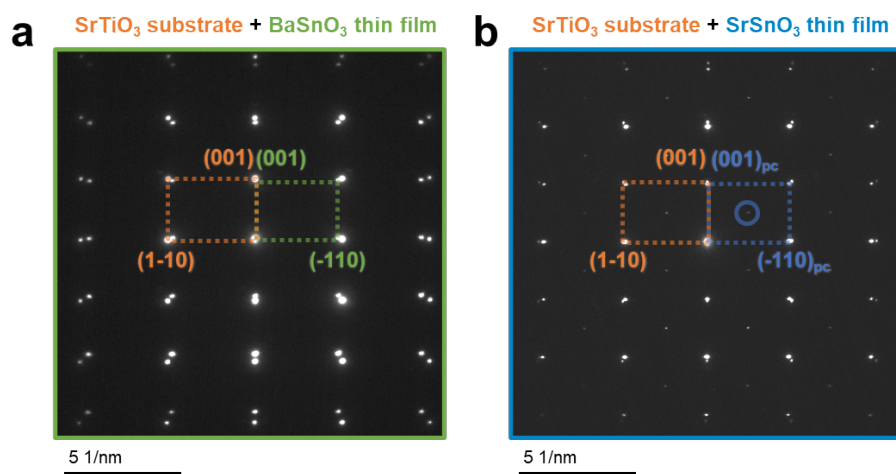

**Figure S2 | Strain relaxation between the BSNO (SSNO) epitaxial thin film and  $\text{SrTiO}_3$  substrate.** **a**, The electron diffraction patterns of BSNO and **b**, SSNO thin film with the  $\text{SrTiO}_3$  substrate, respectively. Spot splitting due to the lattice parameter difference between BSNO(SSNO) films and  $\text{SrTiO}_3$  substrate.

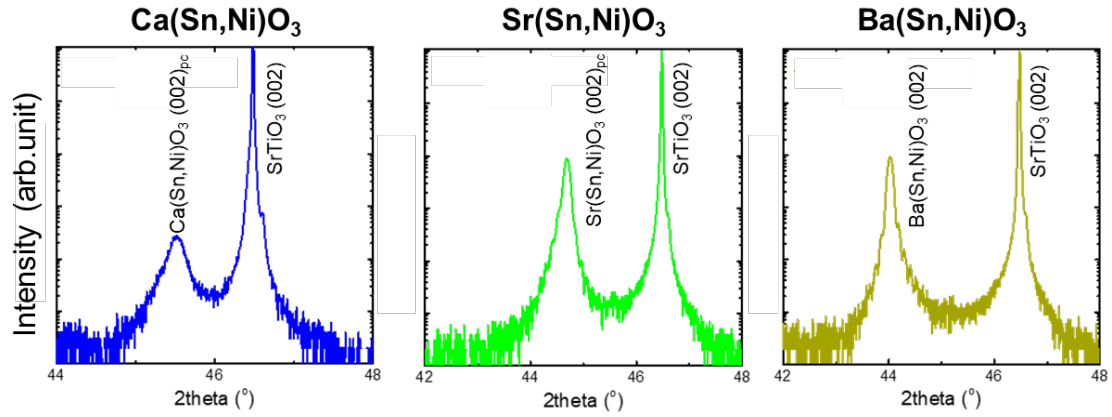

**Figure S3 | X-ray diffraction of  $\text{A}(\text{Sn,Ni})\text{O}_3$  ( $\text{A} = \text{Ca}, \text{Sr}, \text{Ba}$ ) thin films after exsolution process.**

$\theta$ - $2\theta$  scan of (001)-oriented  $\text{Ca}(\text{Sn,Ni})\text{O}_3$ ,  $\text{Sr}(\text{Sn,Ni})\text{O}_3$ , and  $\text{Ba}(\text{Sn,Ni})\text{O}_3$  epitaxial thin films on  $\text{SrTiO}_3$  single-crystal substrates. After exsolution treatment, no secondary phase peak was observed in x-ray diffraction, which indicates that perovskite stannate framework was maintained even after thermal annealing process.

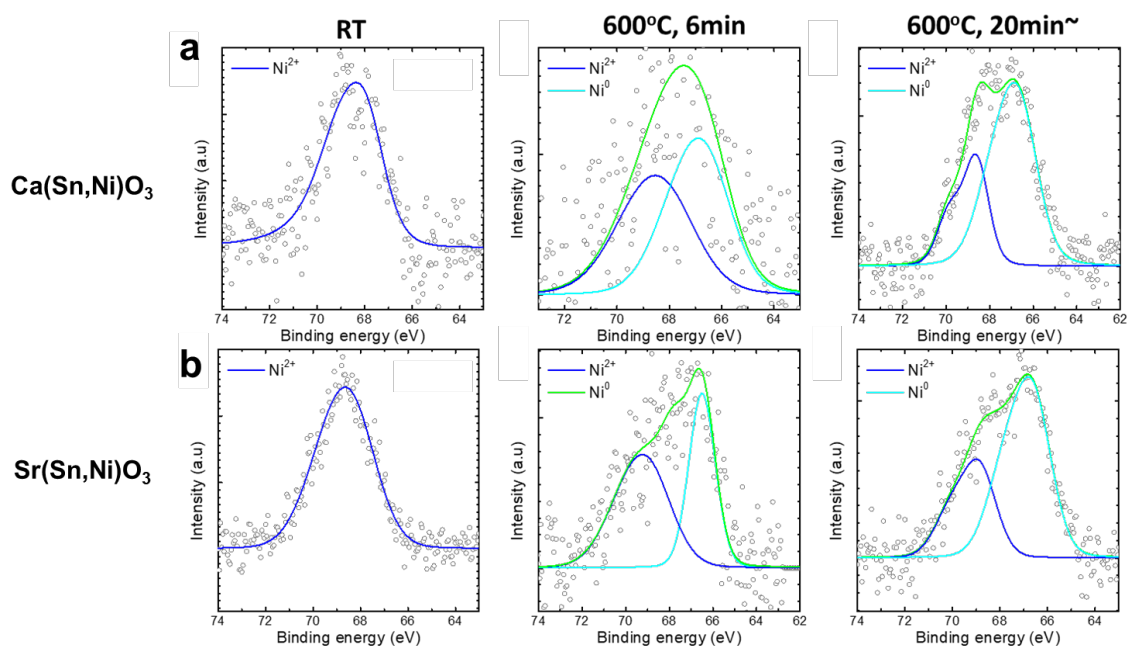

**Figure S4 | *In situ* APXPS Ni 3*p* spectra of Ca(Sn, Ni)O<sub>3</sub> and Sr(Sn, Ni)O<sub>3</sub> matrix as a function of annealing time during exsolution. a**, Time-dependent Ni 3*p* spectra of Ca(Sn,Ni)O<sub>3</sub> and **b**, Sr(Sn,Ni)O<sub>3</sub> at different annealing condition: room temperature, 600°C (maintained for 6 min), 600°C (maintained for 20 min). Note that Ni 3*p* spectra were deconvoluted into Ni<sup>2+</sup> 3*p* and Ni<sup>0</sup> 3*p* peaks for quantitative analysis.

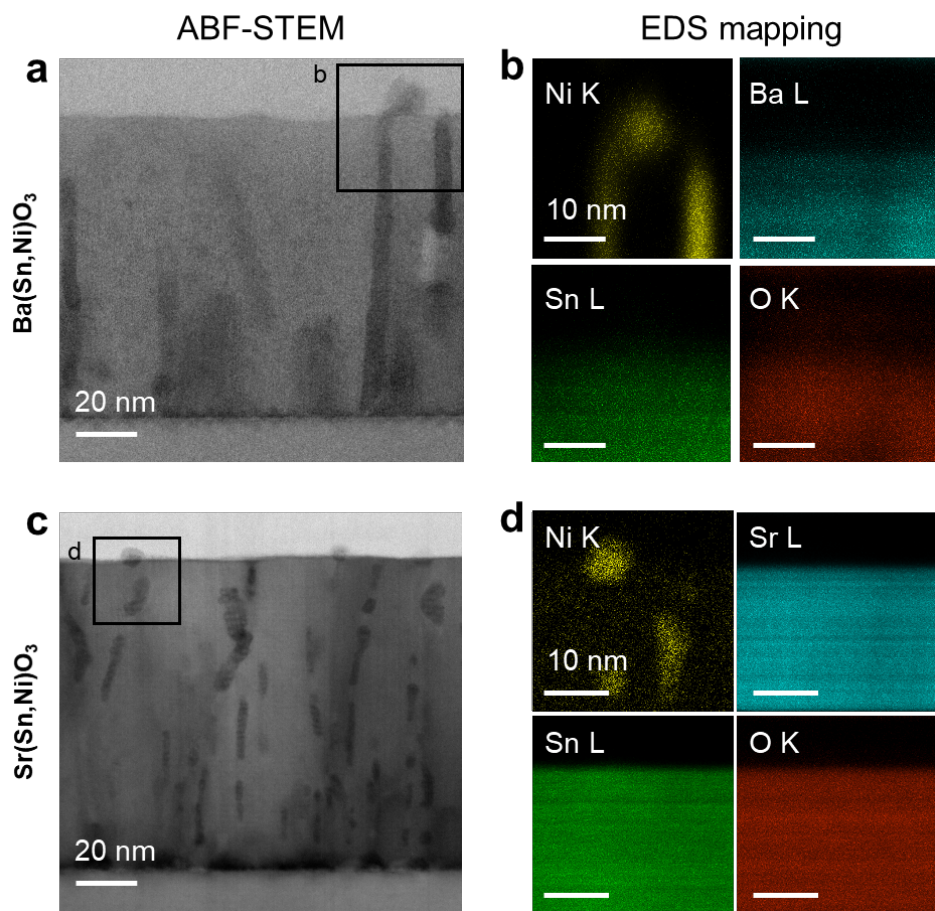

**Figure S5 | STEM-EDS mapping of exsolved particles.** **a**, Cross-sectional ABF-STEM image depicting an annealed BSNO film. **b**, EDS elemental map highlighting the distribution of Ni, Ba, Sn and O (located within the black square in **Fig S5a**). **c**, Cross-sectional ABF-STEM image illustrating an annealed SSNO film. **d**, EDS elemental map showcasing the spatial distribution of Ni, Sr, Sn and O (enclosed within the black square in **Fig S5c**). Both ABF images along with the corresponding EDS mapping images, with a zone axis at  $[110]$  and  $[110]_{pc}$ .

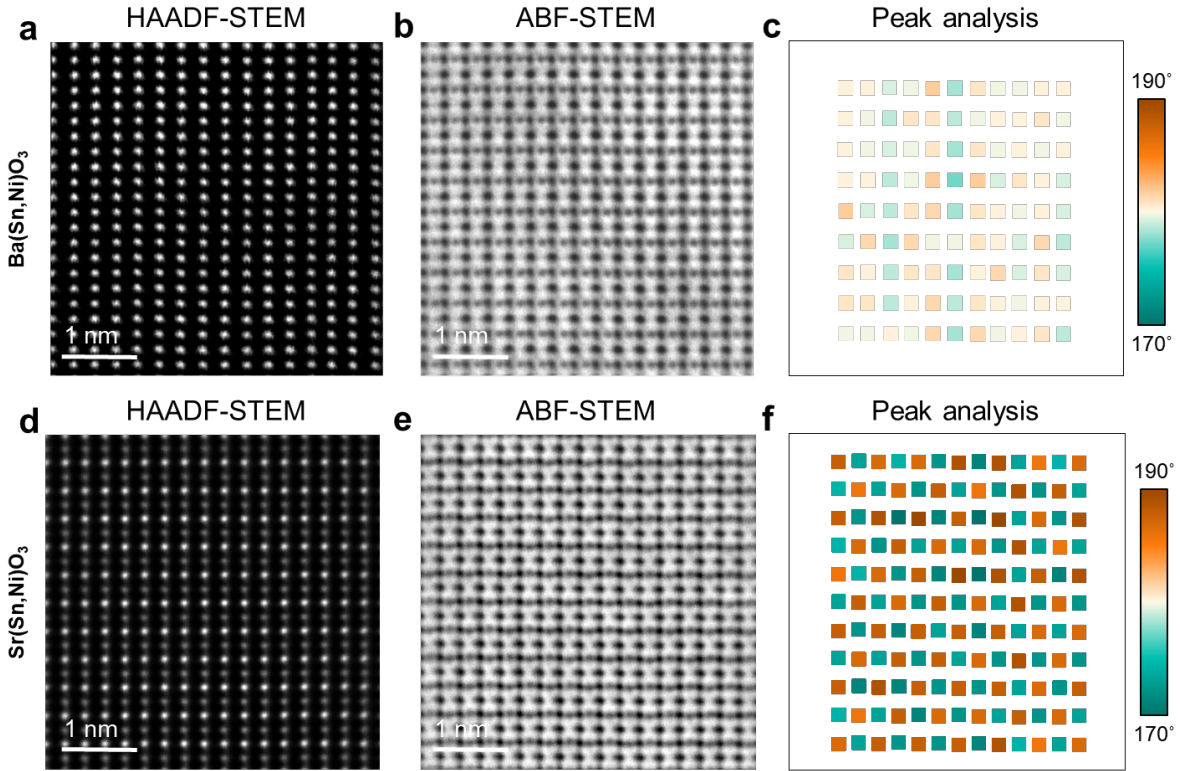

**Figure S6 | Oxygen tilting angles of BSNO and SSNO thin films.** **a**, HAADF and **b**, ABF images of BSNO, respectively, showing the Sn-O-Sn angle within their lattice structures. **c**, The colored boxes in the graph represent the distribution and variation of the Sn-O-Sn tilting angle in the BSNO thin film. **d**, HAADF and **e**, ABF images of SSNO, respectively, showing the Sn-O-Sn angle within their lattice structures. **f**, The colored boxes in the graph illustrate the distribution and variation of the Sn-O-Sn tilting angle in SSNO thin film. The data presented in the graph depict the distribution of Sn-O-Sn angle in both BSNO and SSNO thin films.

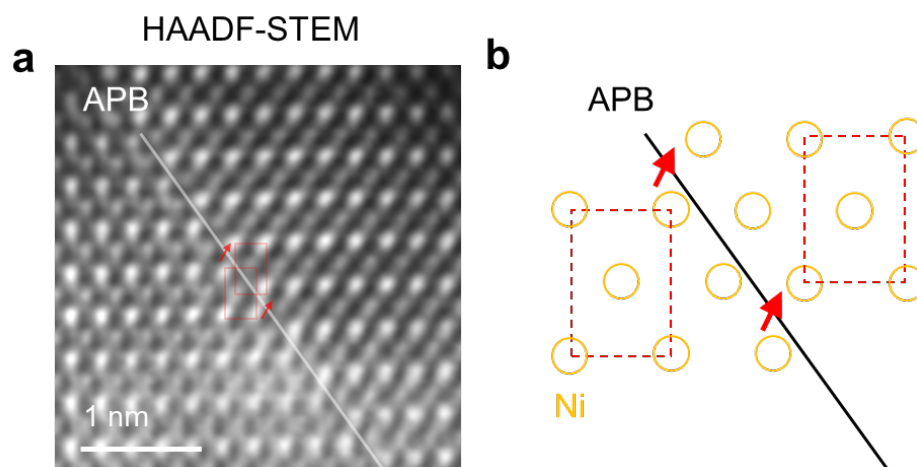

**Figure S7 | Antiphase boundary in Ni particle on SSNO thin film. a,** HAADF-STEM image highlighting antiphase boundaries (APB) in the Ni particle on the SSNO surface. The white line indicates the APB and the red line denotes the displaced Ni atoms. **b,** Schematic model illustrating the configuration of the APB.



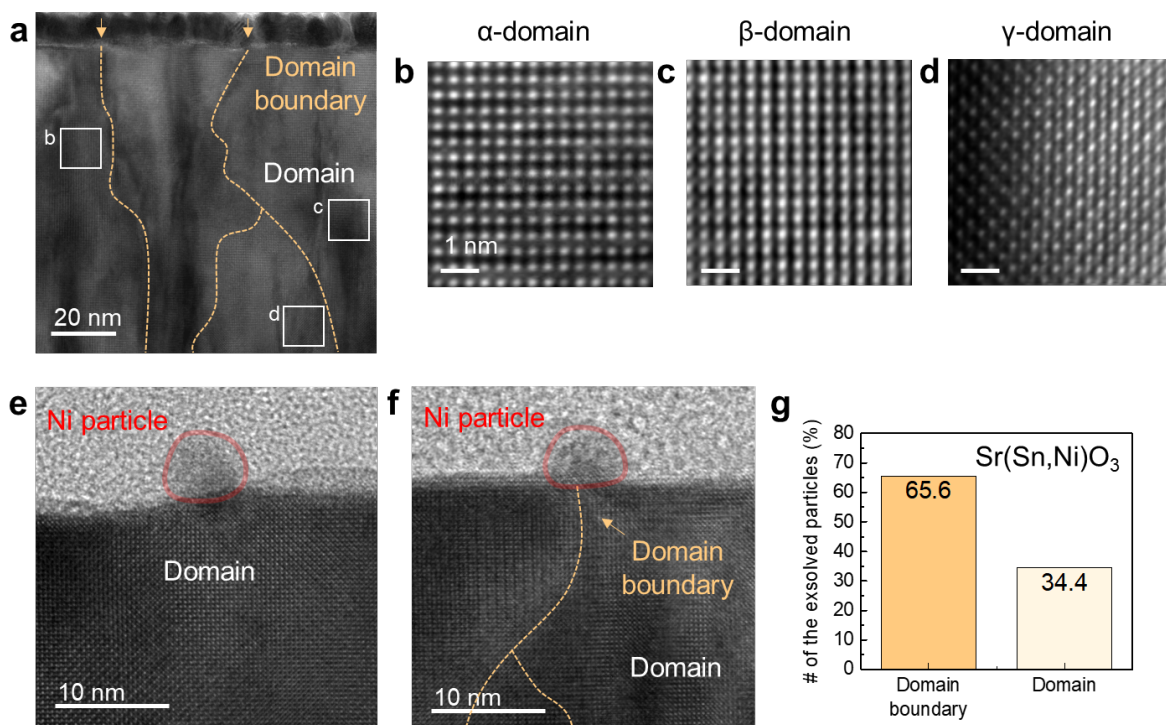

**Figure S8 | Atomic-scale analysis of exsolved Ni nanoparticles on domain boundaries in the perovskite alkaline stannate SSNO matrix after exsolution.** **a**, Cross-sectional HRTEM image of as-grown SSNO film. Note that the low-magnification image shows the oriented domains and domain boundaries (indicated by orange dotted lines) in the SSNO epitaxial film. **b**, High magnified images of the oriented domains:  $\alpha$ -domain, **c**,  $\beta$ -domain, and **d**,  $\gamma$ -domain. **e**, HRTEM image of the Ni nanoparticle on the domain and **f**, the domain boundary in the annealed SSNO film. The exsolved Ni particles are marked by pale red lines. **g**, The number of the exsolved Ni nanoparticles on domains and domain boundaries extracted from HRTEM images. The total number of Ni NPs was 26.

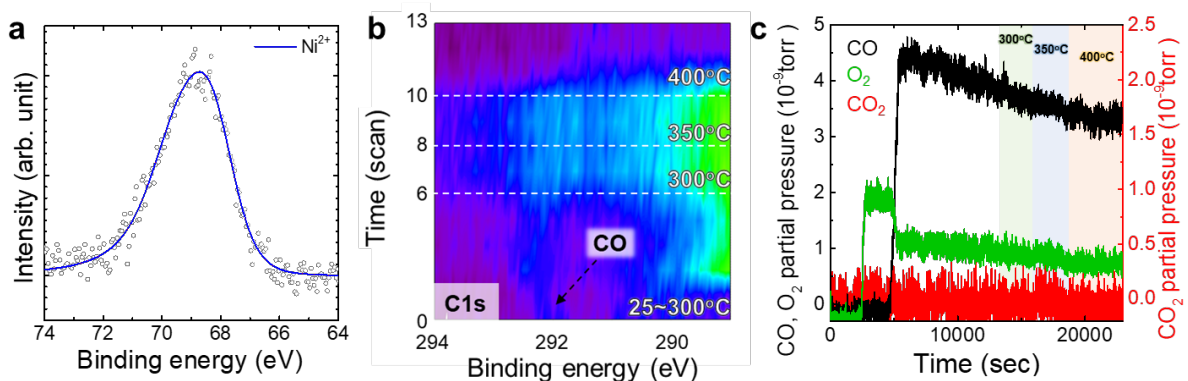

**Figure S9 | *In situ* CO oxidation of as-grown LCSNO matrix.** **a**, Ni 3p spectrum of as-grown LCSNO epitaxial thin films without exsolved Ni nanoparticles. **b**, As-grown LCSNO during heating (25 °C → 400 °C) under CO and O<sub>2</sub> gas flows. The peak assigned to the CO gas phase ( $E_b = 291.81$  eV) shifted to lower binding energy under heating. The conversion of CO to CO<sub>2</sub> was carried out under 1.02 mbar CO gas and 1.06 mbar O<sub>2</sub> gas. **c**, Chemical composition of the reactant and product gas during CO oxidation using RGA. The partial pressure of CO<sub>2</sub> gas remained almost constant under the CO and O<sub>2</sub> gas reaction.

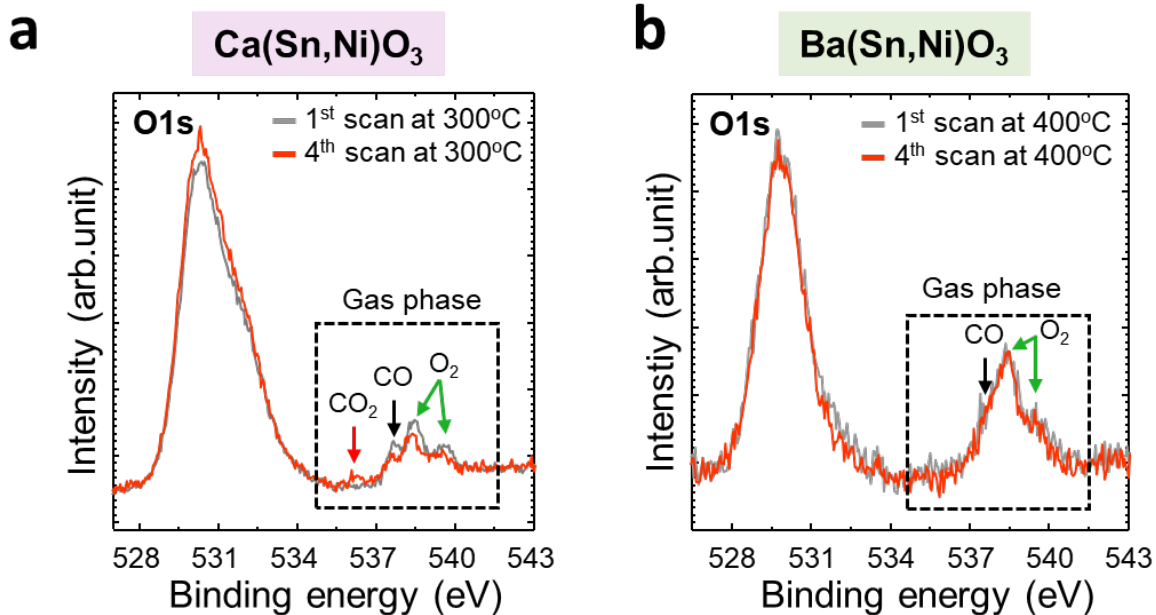

**Figure S10 | *In situ* APXPS O 1s spectra of Ni-exsolved LCSNO and LBSNO films during CO oxidation reaction.** **a**, The O 1s spectra of Ni-exsolved LCSNO films at 300°C and **b**, Ni-exsolved LBSNO at 400°C during CO oxidation reaction. Note that gas phase peak related to CO<sub>2</sub> obviously evolved in Ni-exsolved LCSNO films at the expense of CO and O<sub>2</sub> gas phase peaks (a).
